# Supplementary material for: RB1CC1-enhanced autophagy facilitates PSCs activation and pancreatic fibrogenesis in chronic pancreatitis
Source: PubMed Central journal article supplement (PMC6147947; doi:10.1038/s41419-018-0980-4), 2018-09-20

# Supplementary Figure 1

**a**

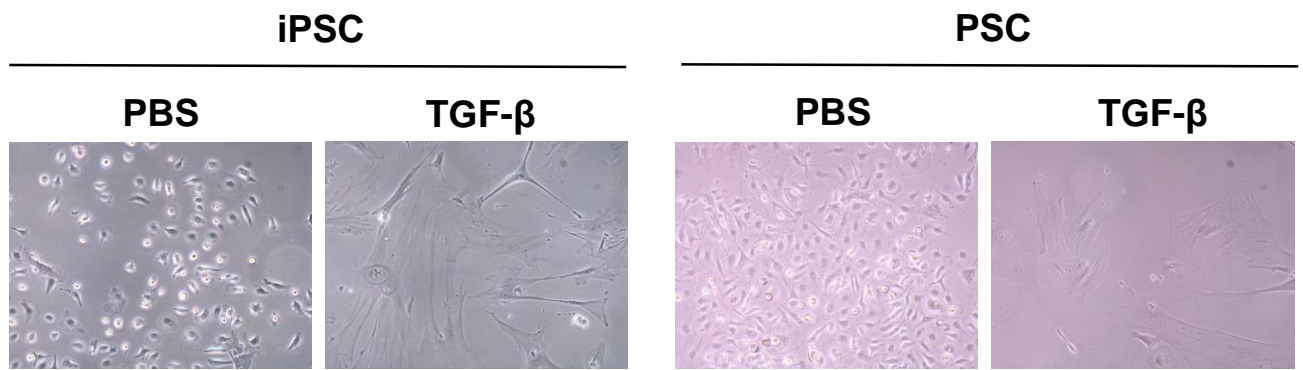

**b**

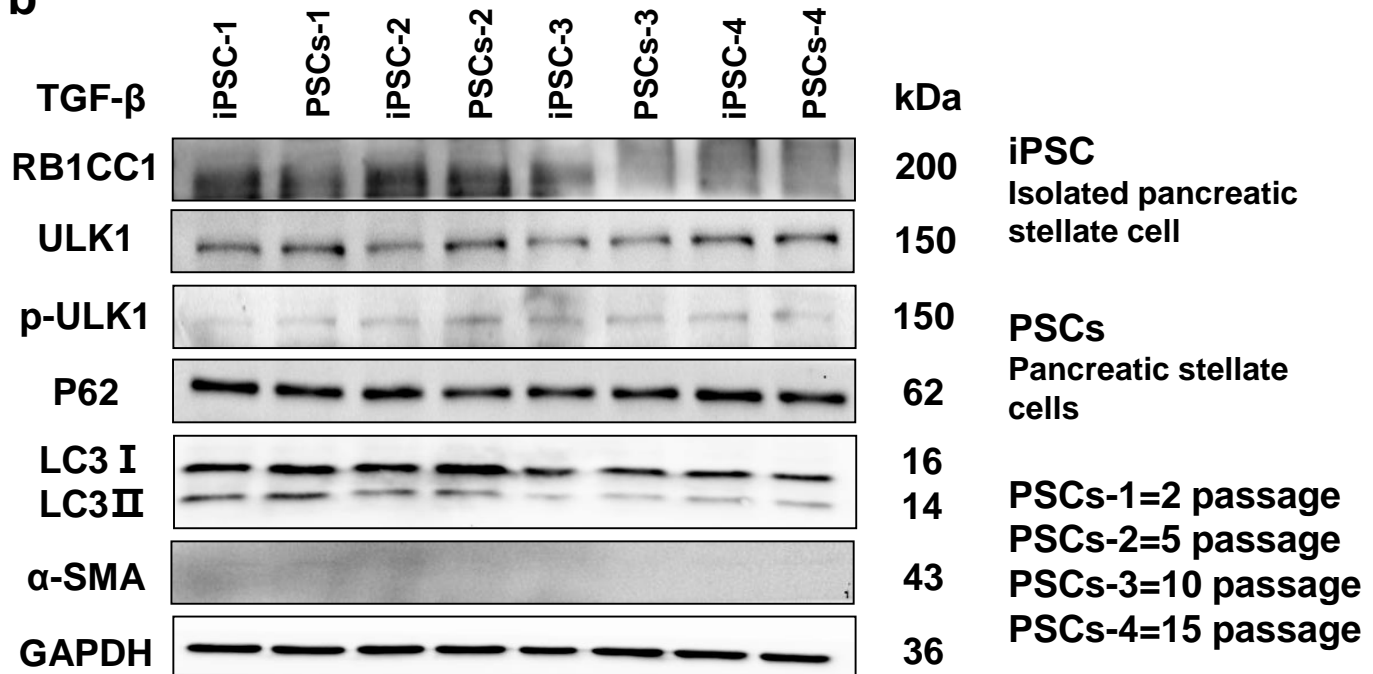

**c**

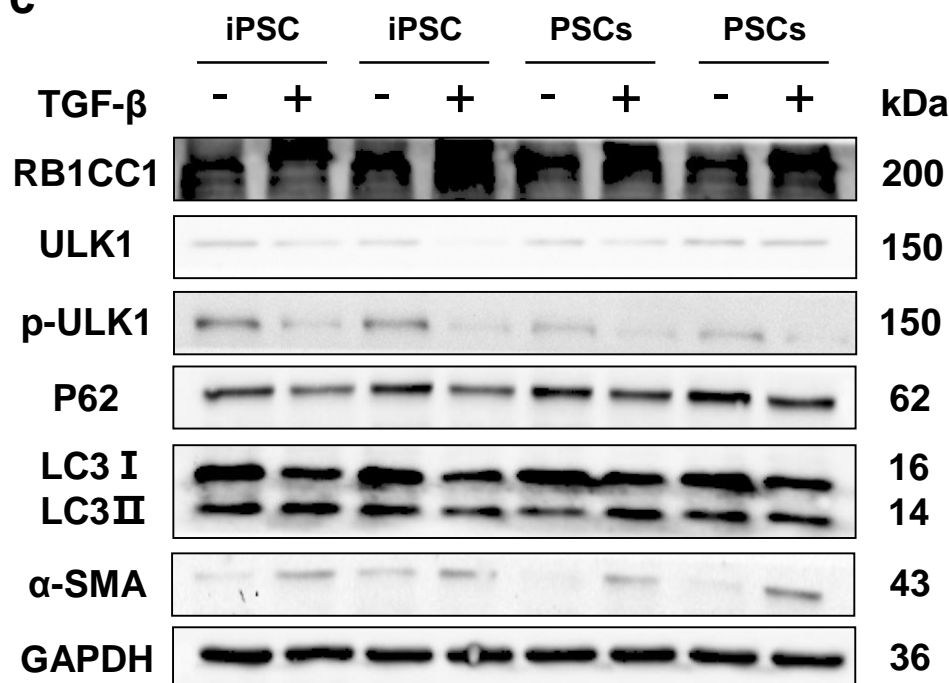

**d**

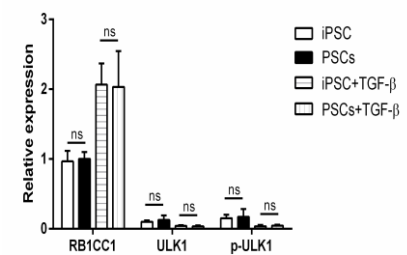

**e**

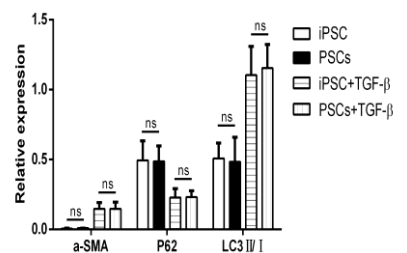

# Supplementary Figure 2

**a**

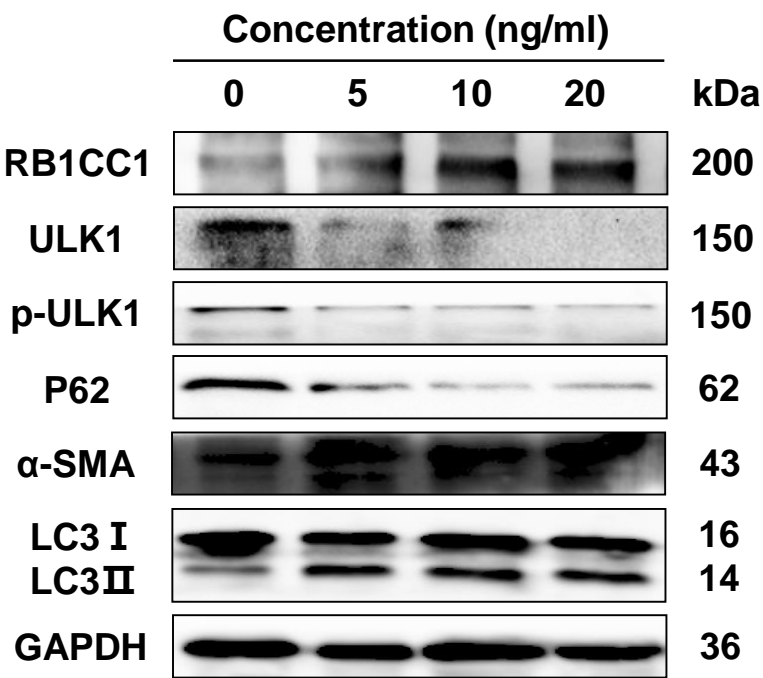

**b**

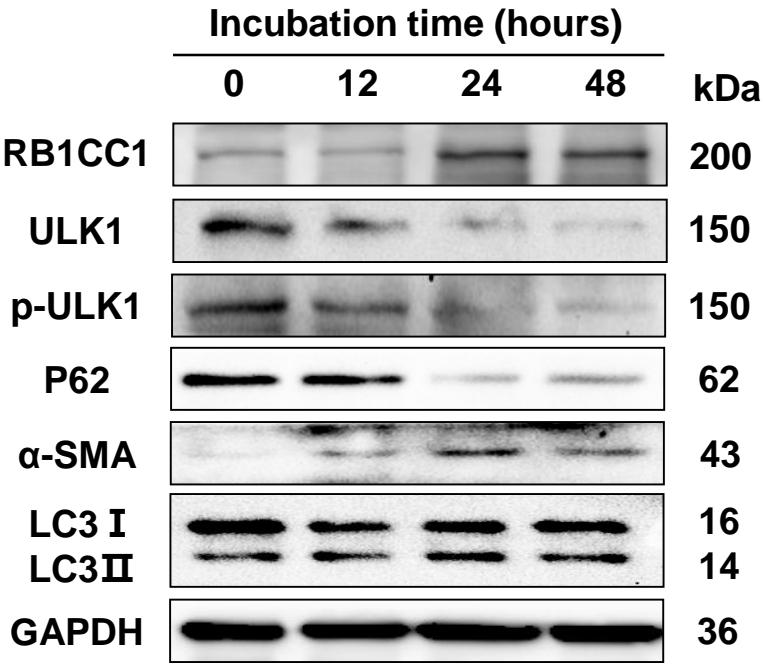

# Supplementary Figure 3

**a**

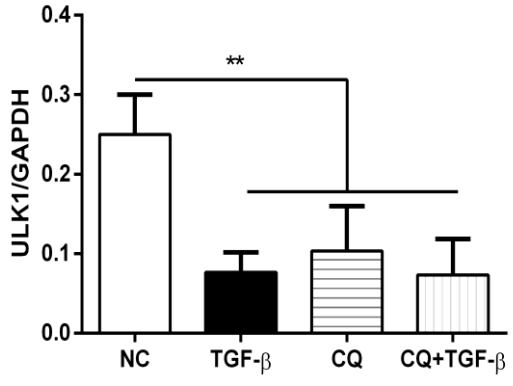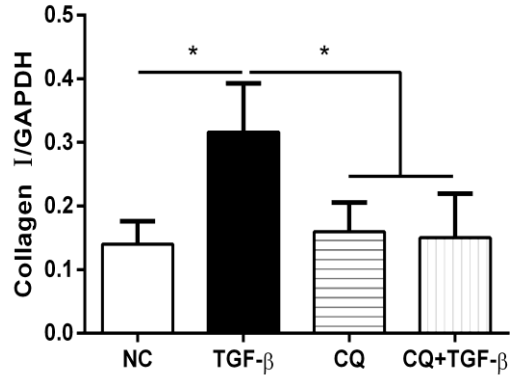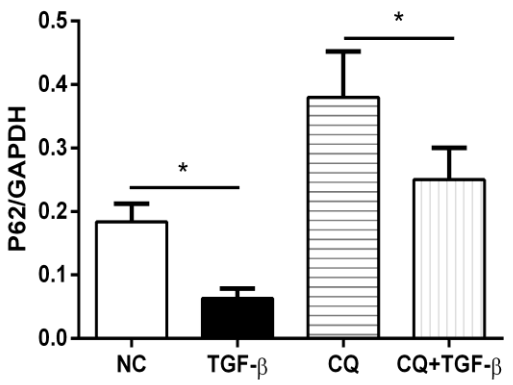

**b**

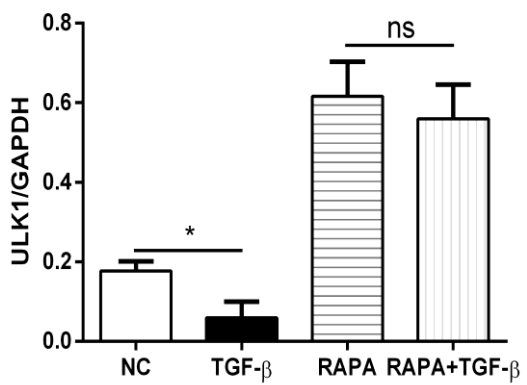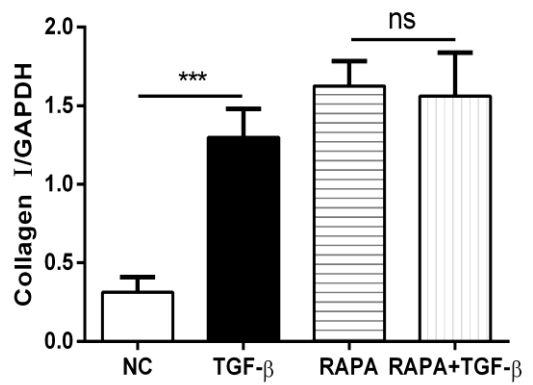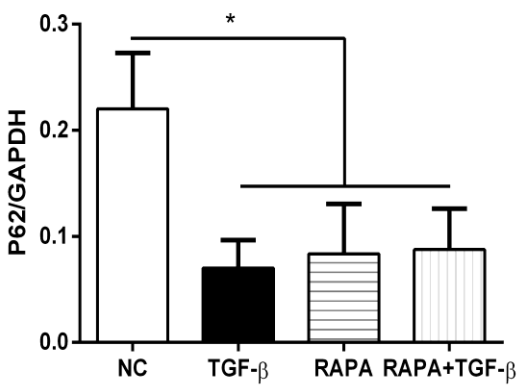

# Supplementary Figure 4

**a**

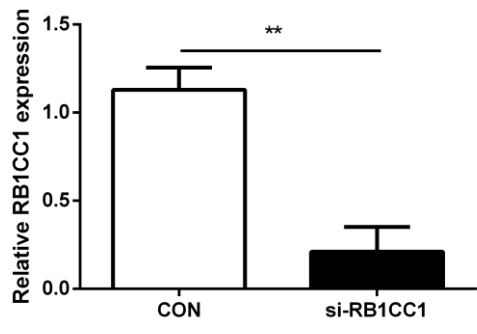

**b**

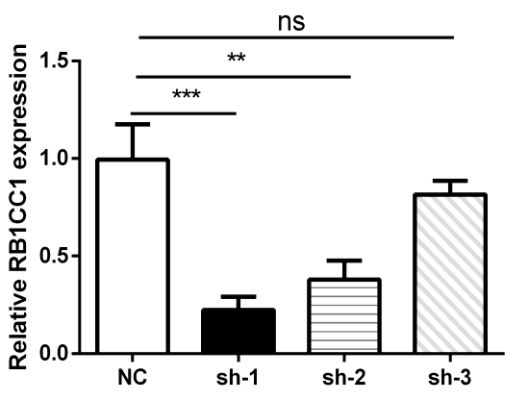

**c**

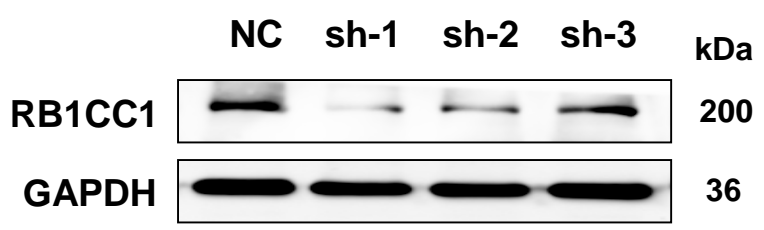

# Supplementary Figure 5

**a**

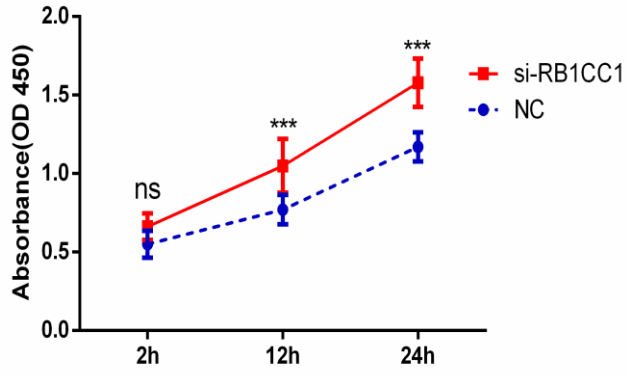

**b**

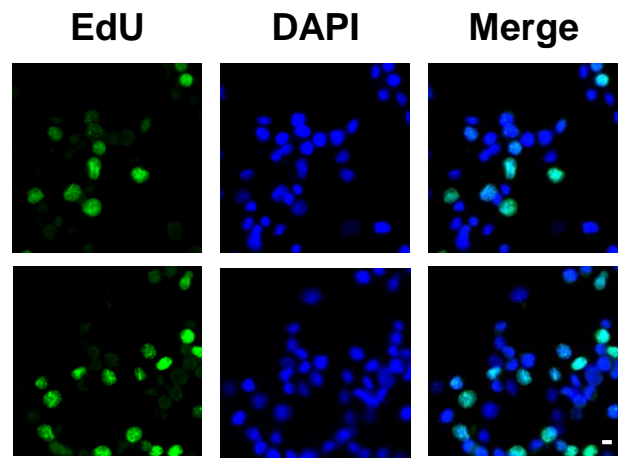

**c**

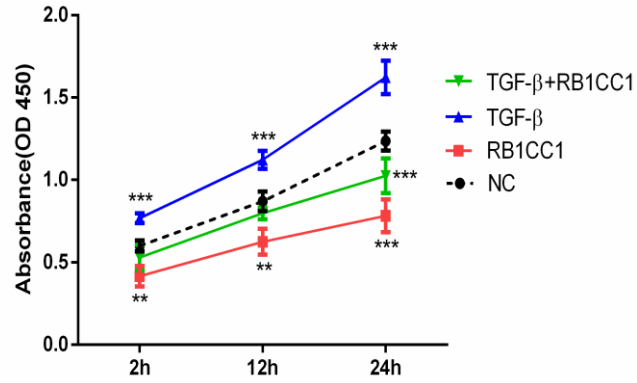

**d**

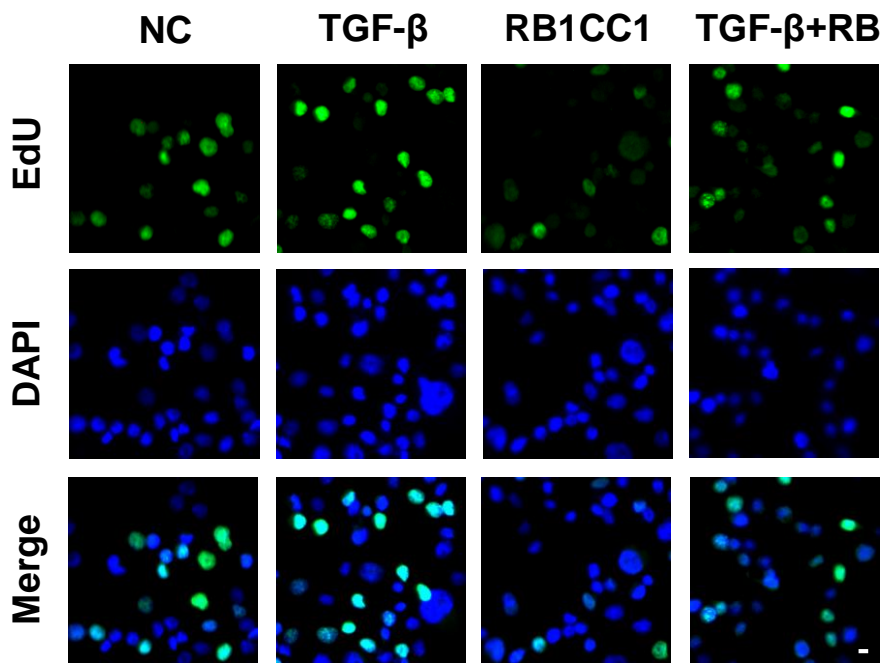

# Supplementary Figure 6

**a**

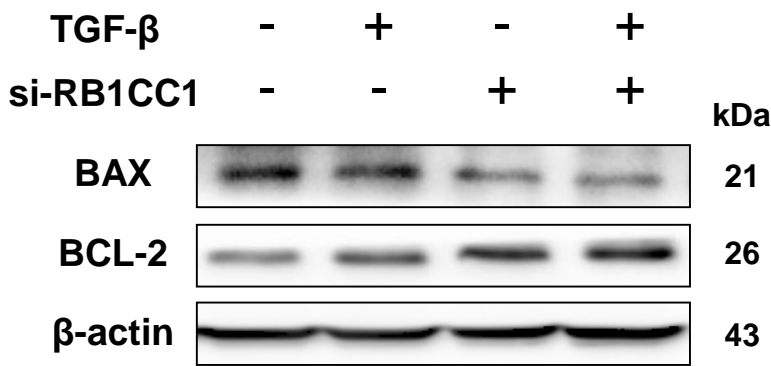

# Supplementary Figure 7

a

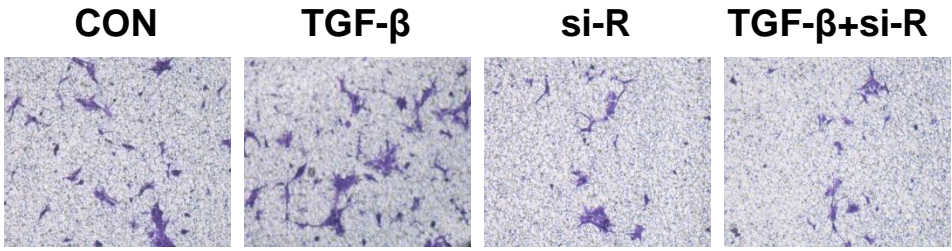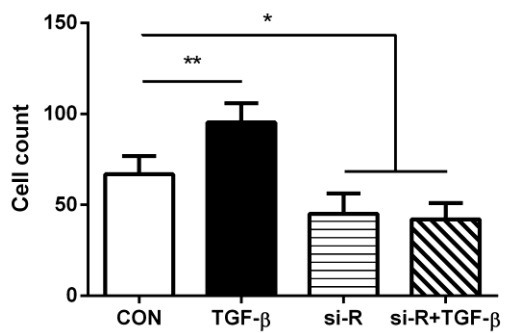

# Supplementary Figure 8

a

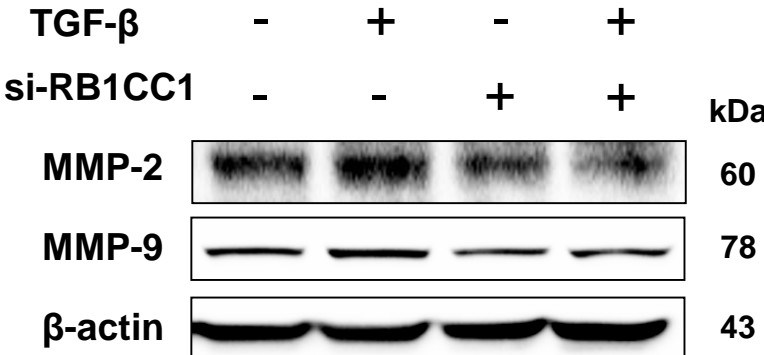



# Supplementary Figure 9

**a**

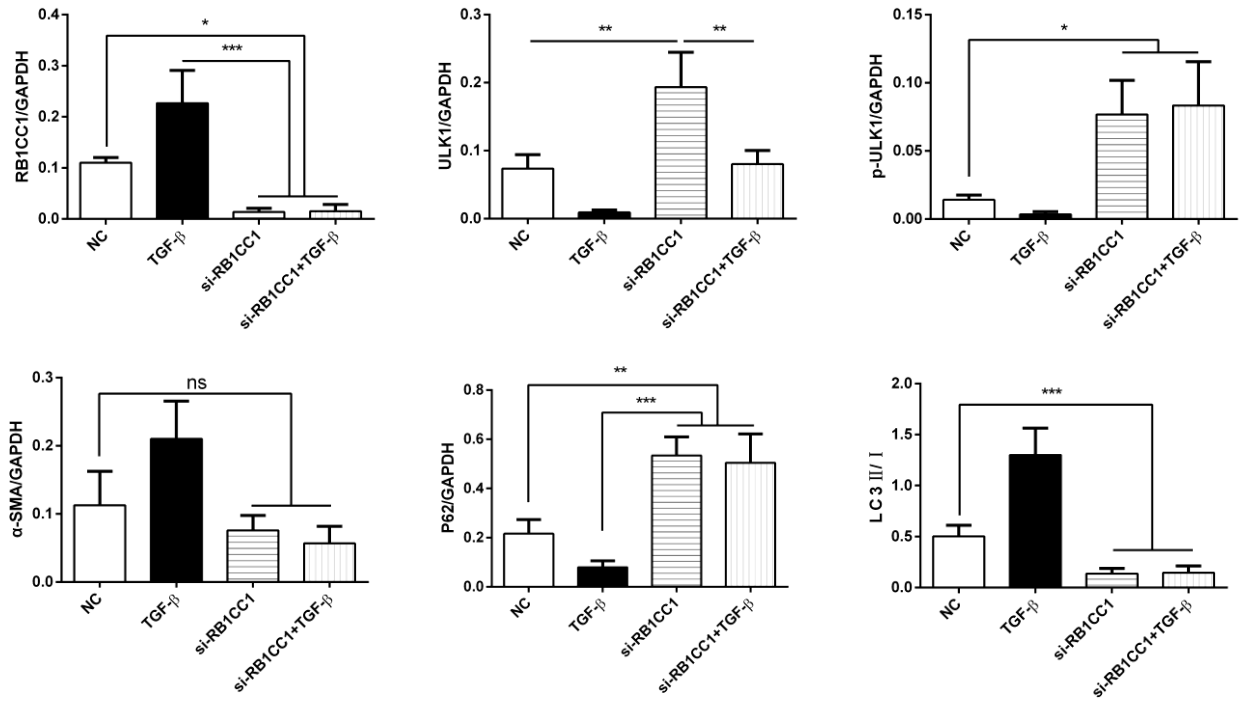

**b**

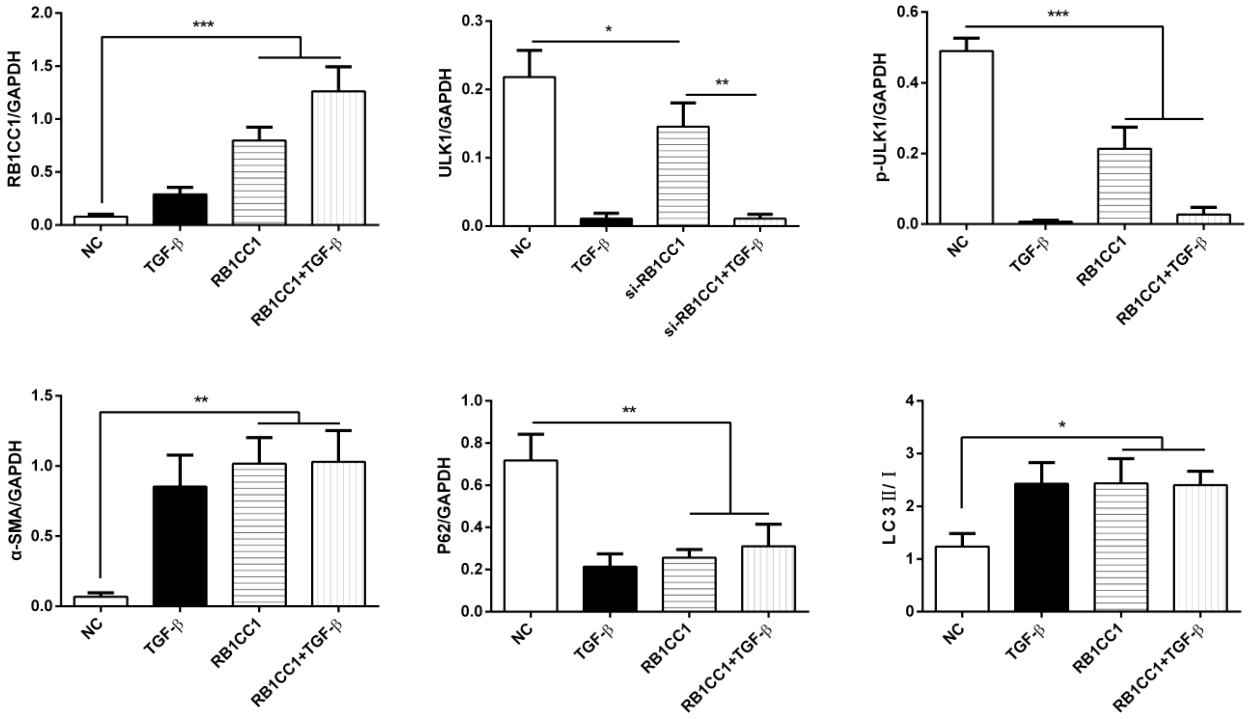

# Supplementary Figure 10

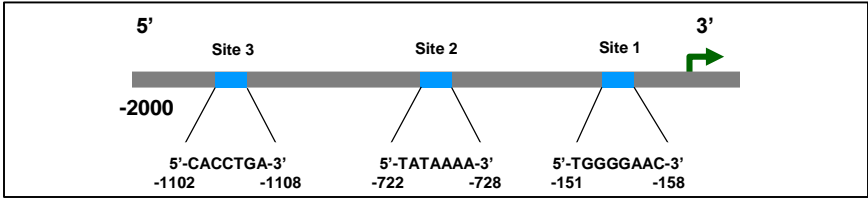

# Supplementary Figure 11

**a**

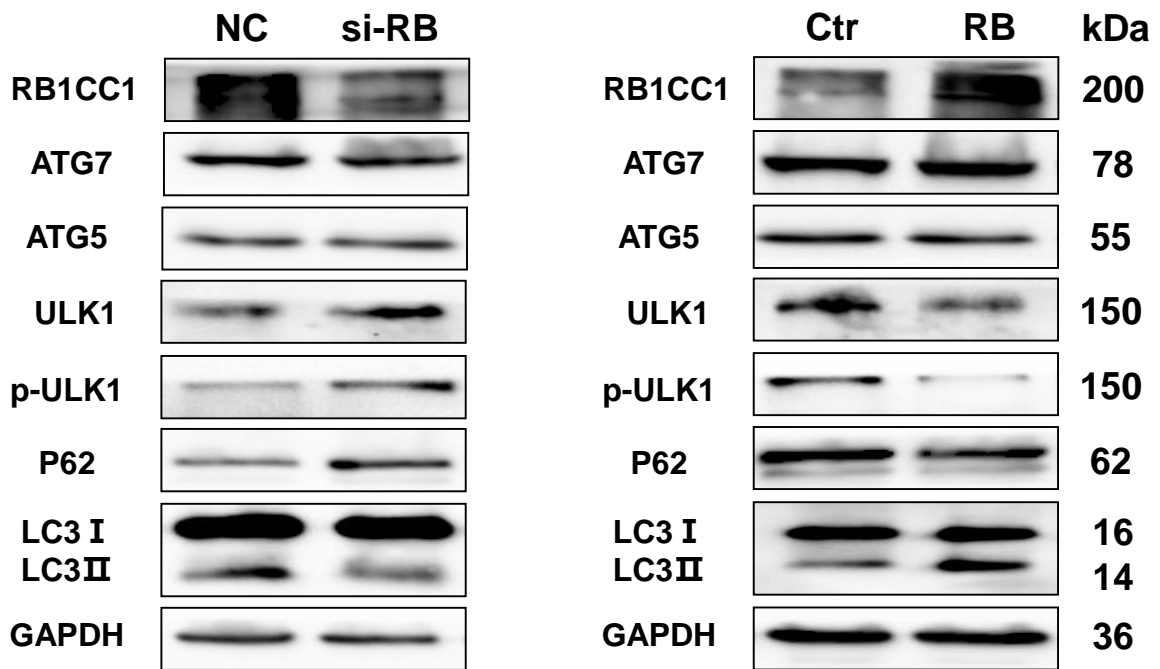

**b**

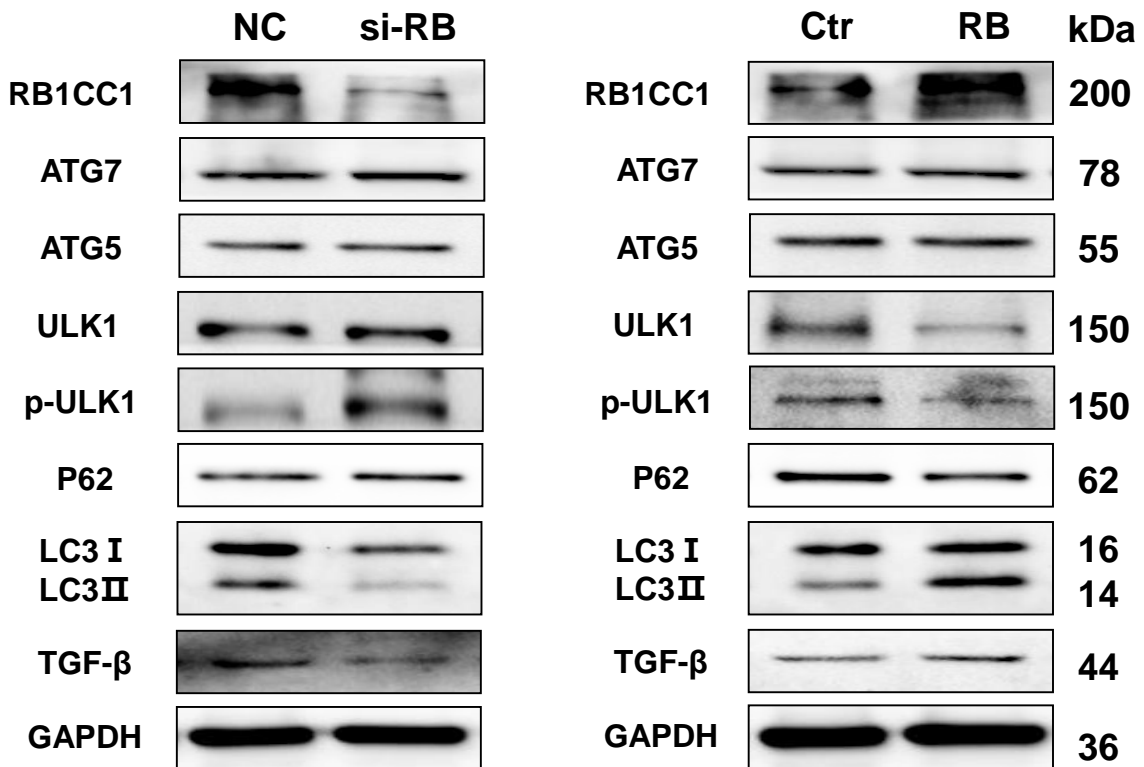

Supplement: 41419_2018_980_MOESM2_ESM.pdf [file 41419_2018_980_MOESM2_ESM.pdf]
